# Supplementary material for: Effect of Platelet Concentrates on Marginal Bone Loss of Immediate Implant Procedures: A Systematic Review and Meta-Analysis
Source: MDPI journal article supplement (doi:10.3390/ma14164582), 2021-08-15
Supplement: s1 [file s1]

# Supplementary material

## MBL at 6 months in PCs vs. no PCs group

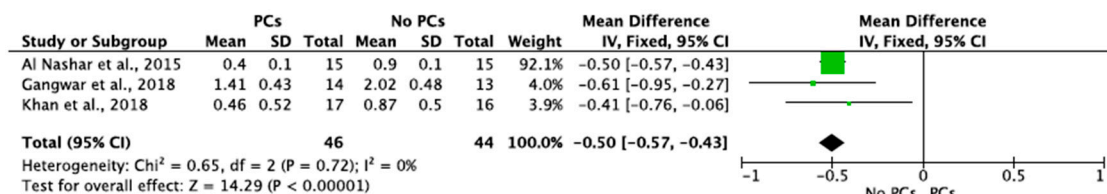

**Figure S1.** Fixed-effect meta-analysis evaluating MBL in both aspects at 6 months in immediate implants procedures with PCs vs. no PCs. (MD -0.50, 95% CI [-0.57, -0.43];  $p < 0.00001$ ). ( $I^2 = 0\%$ ).

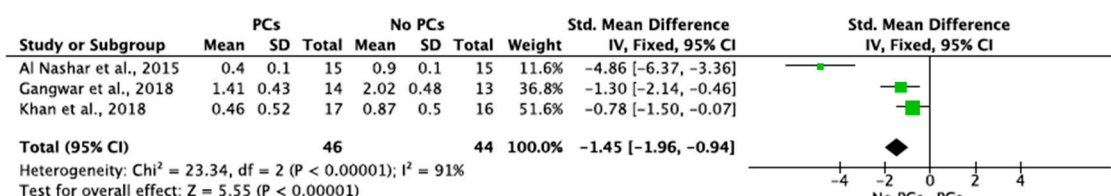

**Figure S2.** Fixed-effect meta-analysis evaluating MBL in both aspects at 6 months in immediate implants procedures with PCs vs. no PCs. (SMD -1.45, 95% CI [-1.96, -0.94];  $p < 0.00001$ ). ( $I^2 = 91\%$ ).

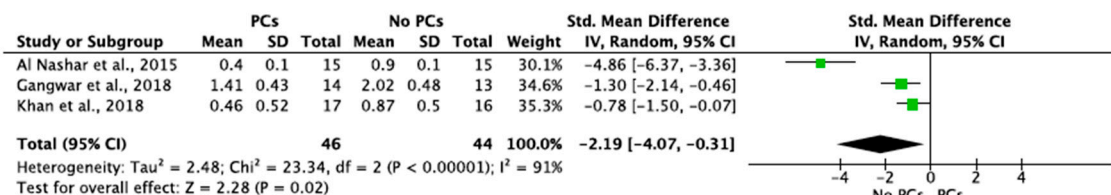

**Figure S3.** Random-effect meta-analysis evaluating MBL in both aspects at 6 months in immediate implants procedures with PCs vs. no PCs. (SMD -2.19, 95% CI [-4.07, -0.31];  $p = 0.02$ ). ( $I^2 = 91\%$ ).

## MBL at 12 months in PCs vs. no PCs:

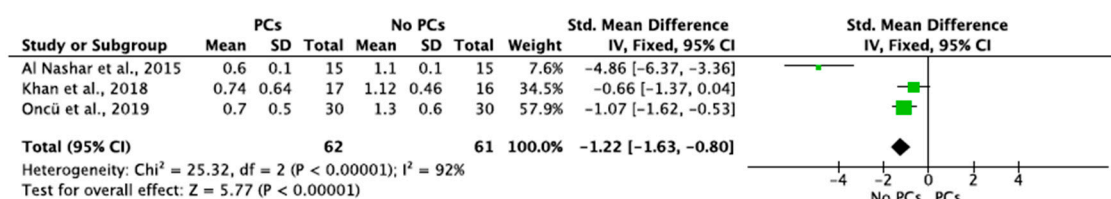

**Figure S4.** Fixed-effect meta-analysis evaluating MBL in both aspects at 12 months in immediate implants procedures with PCs vs. no PCs. (SMD -1.22, 95% CI [-1.63, -0.80];  $p < 0.00001$ ). ( $I^2 = 92\%$ ).

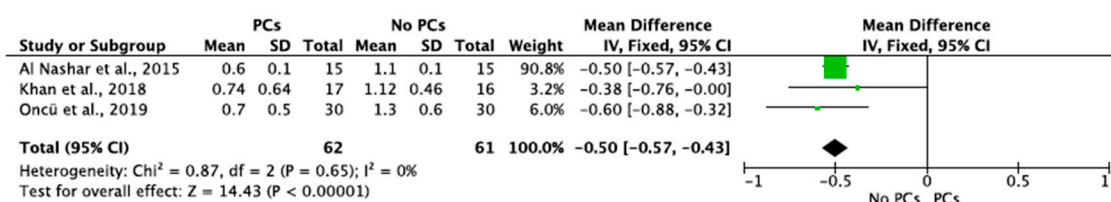

**Figure S5.** Fixed-effect meta-analysis evaluating MBL in both aspects at 12 months in immediate implants procedures with PCs vs. no PCs. (MD -0.5, 95% CI [-0.57, -0.43];  $p < 0.00001$ ). ( $I^2 = 0\%$ ).

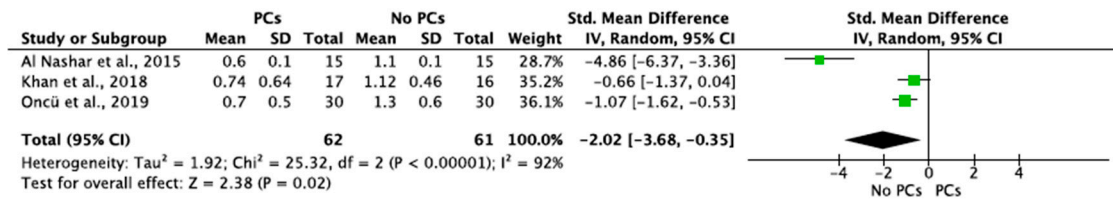

**Figure S6.** Random-effect meta-analysis evaluating MBL in both aspects at 12 months in immediate implants procedures with PCs vs. no PCs. (SMD -2.02, 95% CI [-3.86, -0.35];  $p = 0.02$ ). ( $I^2 = 92\%$ ).

#### MBL at 6 months in PCs + bone graft vs. only bone graft:

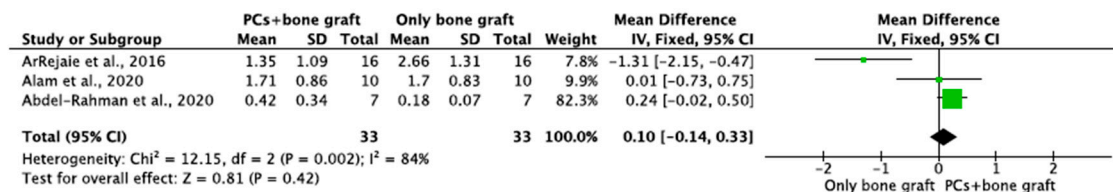

**Figure S7.** Fixed-effect meta-analysis evaluating MBL in both aspects at 12 months in immediate implants procedures with PCs + bone graft group vs. only bone graft. (MD 0.10, 95% CI [-0.14, 0.33];  $p = 0.42$ ). ( $I^2 = 84\%$ ).

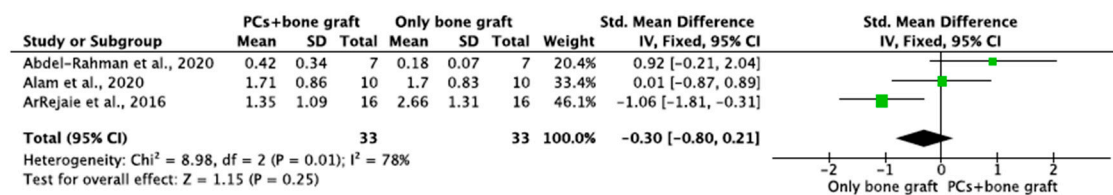

**Figure S8.** Fixed-effect meta-analysis evaluating MBL in both aspects at 12 months in immediate implants procedures with PCs + bone graft group vs. only bone graft. (SMD -0.30, 95% CI [-0.80, 0.21];  $p = 0.25$ ). ( $I^2 = 78\%$ ).

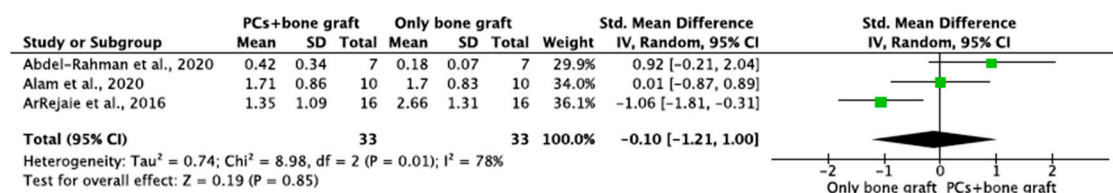

**Figure S9.** Random-effect meta-analysis evaluating MBL in both aspects at 12 months in immediate implants procedures with PCs + bone graft group vs. only bone graft. (SMD -0.1, 95% CI [-1.21, 1.00];  $p = 0.85$ ). ( $I^2 = 78\%$ ).

#### MBL at 12 months in PCs + bone graft vs. only bone graft:

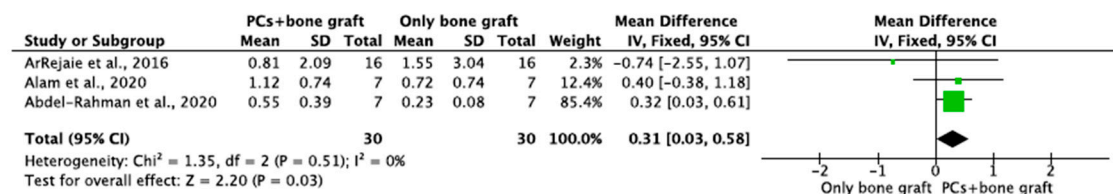

**Figure S10.** Fixed-effect meta-analysis evaluating MBL in both aspects at 12 months in immediate implants procedures with PCs + bone graft group vs. only bone graft. (MD 0.31, 95% CI [0.03, 0.58];  $p = 0.03$ ). ( $I^2 = 0\%$ ).

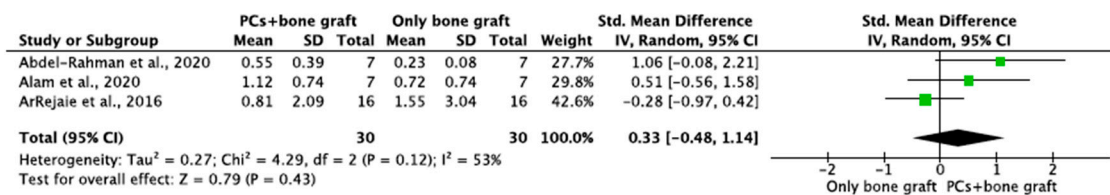

**Figure S11.** Random-effect meta-analysis evaluating MBL in both aspects at 12 months in immediate implants procedures with PCs + bone graft group vs. only bone graft. (SMD 0.33, 95% CI [-0.48, 1.14];  $p = 0.43$ ). ( $I^2 = 53\%$ ).

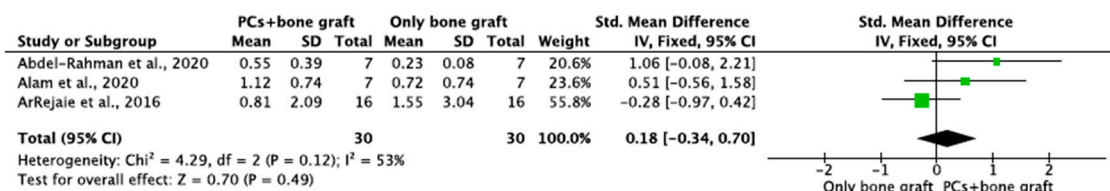

**Figure S12.** Fixed-effect meta-analysis evaluating MBL in both aspects at 12 months in immediate implants procedures with PCs + bone graft group vs. only bone graft. (SMD 0.18, 95% CI [-0.34, 0.70];  $p = 0.49$ ). ( $I^2 = 53\%$ ).
